# Supplementary material for: The Neuroprotection of Verbascoside in Alzheimer’s Disease Mediated through Mitigation of Neuroinflammation via Blocking NF-κB-p65 Signaling
Source: MDPI journal article supplement (doi:10.3390/nu14071417), 2022-03-29
Supplement: s1 [file s1]

**Table S1.** List of antibodies introduced in immunohistochemistry, immunofluorescence, and western blot

| Antibody                            | Molecular weight | Catalog number | Dilution | Application          | Company                   | Area                |
|-------------------------------------|------------------|----------------|----------|----------------------|---------------------------|---------------------|
| GFAP                                | 50 kDa           | PB9082         | 1:400    | Immunohistochemistry | Boster                    | Wuhan, China        |
| Iba-1                               | 17 kDa           | 10904-1-AP     | 1:400    | Immunohistochemistry | Proteintech               | Wuhan, China        |
| GFAP                                | 49 kDa           | GB12096        | 1:500    | Immunofluorescence   | Servicebio                | Wuhan, China        |
| S100B                               | 11 kDa           | GB11359        | 1:500    | Immunofluorescence   | Servicebio                | Wuhan, China        |
| SORBS2                              | 70 kDa           | 24643-1-AP     | 1:1000   | Western blot         | Proteintech               | Wuhan, China        |
| PLXNB2                              | 80 kDa           | A10069         | 1:1000   | Western blot         | ABclonal                  | Wuhan, China        |
| GFAP                                | 50 kDa           | 80788S         | 1:1000   | Western blot         | Cell Signaling Technology | Beverly, MA, USA    |
| Iba-1                               | 17 kDa           | A19776         | 1:1000   | Western blot         | ABclonal                  | Wuhan, China        |
| IL-1 $\beta$                        | 17 kDa           | A1112          | 1:1000   | Western blot         | ABclonal                  | Wuhan, China        |
| IL-4                                | 16 kDa           | A4988          | 1:1000   | Western blot         | ABclonal                  | Wuhan, China        |
| IL-6                                | 26 kDa           | A0286          | 1:1000   | Western blot         | ABclonal                  | Wuhan, China        |
| IL-10                               | 18 kDa           | A2171          | 1:1000   | Western blot         | ABclonal                  | Wuhan, China        |
| iNOS                                | 131 kDa          | A3200          | 1:750    | Western blot         | ABclonal                  | Wuhan, China        |
| TNF- $\alpha$                       | 26 kDa           | 17590-1-AP     | 1:1000   | Western blot         | Proteintech               | Wuhan, China        |
| p-IKK $\alpha$ + $\beta$ (S180/181) | 85 kDa           | AF3013         | 1:1000   | Western blot         | Affinity                  | Cincinnati, OH, USA |

|                                                        |        |            |        |                      |             |                     |
|--------------------------------------------------------|--------|------------|--------|----------------------|-------------|---------------------|
| IKK $\alpha$ + $\beta$                                 | 85 kDa | ab178870   | 1:1000 | Western blot         | Abcam       | Cambridge, MA, USA  |
| p-IkBa (S32/36)                                        | 40 kDa | ab12135    | 1:500  | Western blot         | Abcam       | Cambridge, MA, USA  |
| IkBa                                                   | 35 kDa | ab32518    | 1:4000 | Western blot         | Abcam       | Cambridge, MA, USA  |
| p-NF- $\kappa$ B-p65 (S536)                            | 65 kDa | AF2006     | 1:1000 | Western blot         | Affinity    | Cincinnati, OH, USA |
| NF- $\kappa$ B-p65                                     | 65 kDa | ab16502    | 1:4000 | Western blot         | Abcam       | Cambridge, MA, USA  |
| GAPDH                                                  | 37 kDa | E-AB-20032 | 1:4000 | Western blot         | Elabscience | Wuhan, China        |
| goat anti-mouse                                        |        | E-AB-1001  | 1:4000 | Western blot         | Elabscience | Wuhan, China        |
| goat anti- rabbit                                      |        | E-AB-1003  | 1:4000 | Western blot         | Elabscience | Wuhan, China        |
| Goat anti-rabbit                                       |        | BA1003     | 1:150  | Immunohistochemistry | Boster      | Wuhan, China        |
| Cy3 conjugated goat anti-mouse IgG (H+L)               |        | GB21301    | 1:300  | Immunofluorescence   | Servicebio  | Wuhan, China        |
| Alexa Fluor® 488-conjugated goat anti-rabbit IgG (H+L) |        | GB25303    | 1:400  | Immunofluorescence   | Servicebio  | Wuhan, China        |

---

**Table S2.** Proteins with significantly discrepant expression levels in proteomics

| Number                                   | Protein. names | Unique.<br>peptides | fc. WT-<br>APP/PS1 | fc. APP/PS1+VB-<br>APP/PS1 |
|------------------------------------------|----------------|---------------------|--------------------|----------------------------|
| Upregulated proteins by VB (Number: 3)   |                |                     |                    |                            |
| 1                                        | PPM1F          | 3                   | 4.843248           | 5.910574                   |
| 2                                        | MAT2B          | 5                   | 7.203061           | 6.646857                   |
| 3                                        | SORBS2         | 8                   | 4.168305           | 7.455264                   |
| Downregulated proteins by VB (Number: 2) |                |                     |                    |                            |
| 1                                        | PLXNB2         | 6                   | 0.245348           | 0.260457                   |
| 2                                        | MANF           | 4                   | 0.149661           | 0.228425                   |

fc. WT-APP/PS1: the ratio of protein between WT mice and vehicle-treated APP/PS1 mice;

fc. APP/PS1+VB-APP/PS1: the ratio of protein between VB-treated APP/PS1 mice and vehicle-treated APP/PS1 mice.

Figure Lists

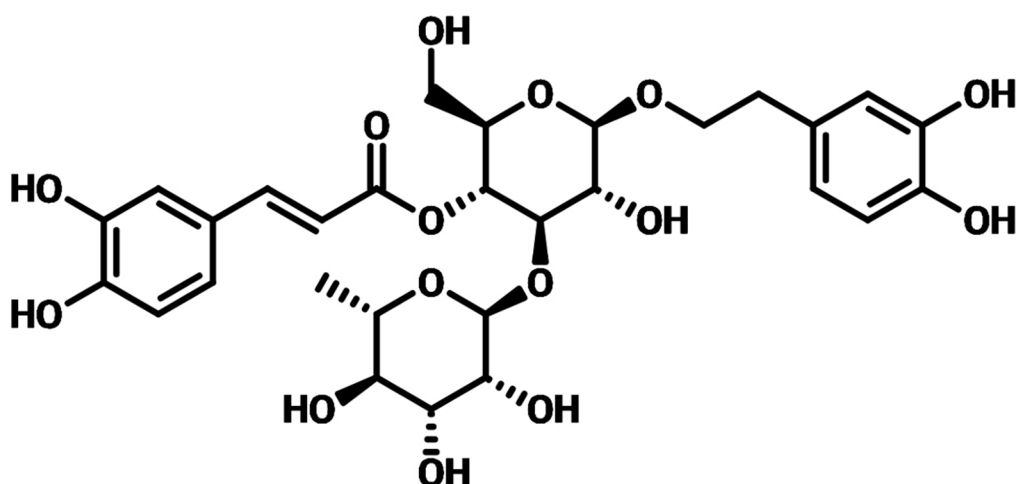

**Figure S1:** The chemical structure of VB (CAS: 61276-17-3).

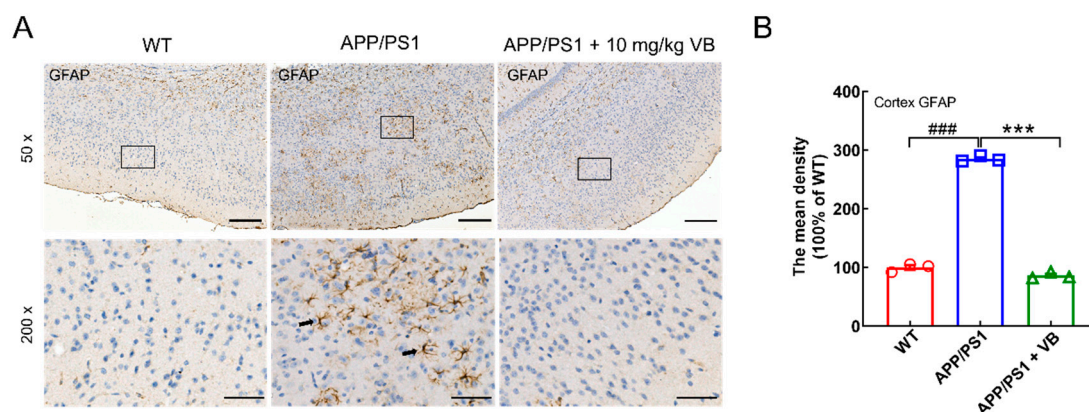

**Figure S2:** (A) VB inhibited the expression of GFAP (black arrow) in the cortex of APP/PS1 mice through immunohistochemistry ( $n = 3$ ). Scale bar = 400  $\mu\text{m}$  for 50 $\times$  magnification, and scale bar = 100  $\mu\text{m}$  for 200 $\times$  magnification. (B) The quantitative analysis of GFAP in WT, APP/PS1 and VB-treated APP/PS1 mice ( $n = 3$ ). ### $p < 0.001$  vs. WT mice; \*\*\* $p < 0.001$  vs. APP/PS1 mice.

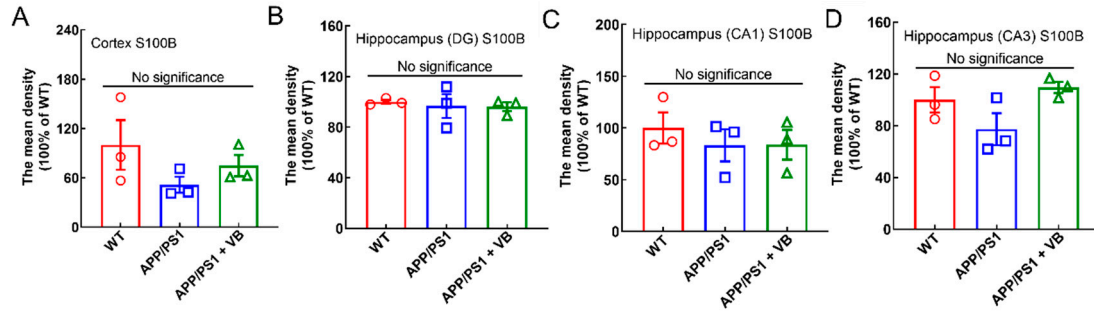

**Figure S3:** The expression of S100B showed no significant discrepancy in the (A) cortex, (B) hippocampus (DG), (C) hippocampus (CA1), (D) hippocampus (CA3) among all experimental groups ( $n = 3$ ).

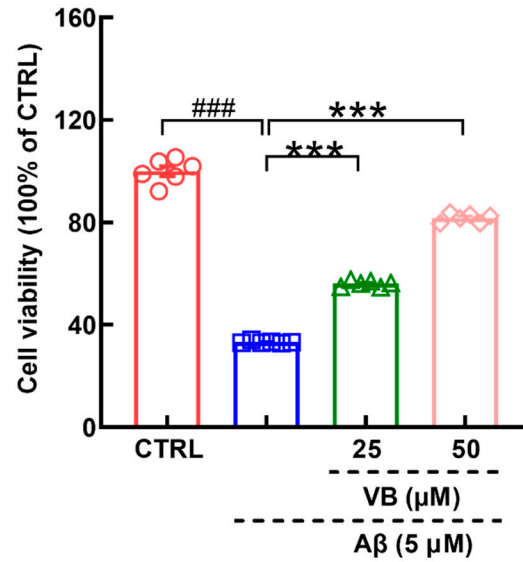

**Figure S4:** VB dose-dependently improved the viability of A $\beta_{1-42}$ -induced N2a cells ( $n = 6$ ).  $^{###}p < 0.001$  vs. CTRL N2a cells;  $^{***}p < 0.001$  vs. A $\beta_{1-42}$ -stimulated N2a cells.
